# Supplementary material for: Evolution and functional characterization of pectate lyase PEL12, a member of a highly expanded Clonostachys rosea polysaccharide lyase 1 family
Source: PubMed Central journal article supplement (PMC6223089; doi:10.1186/s12866-018-1310-9), 2018-11-07

# Additional figure 1

A

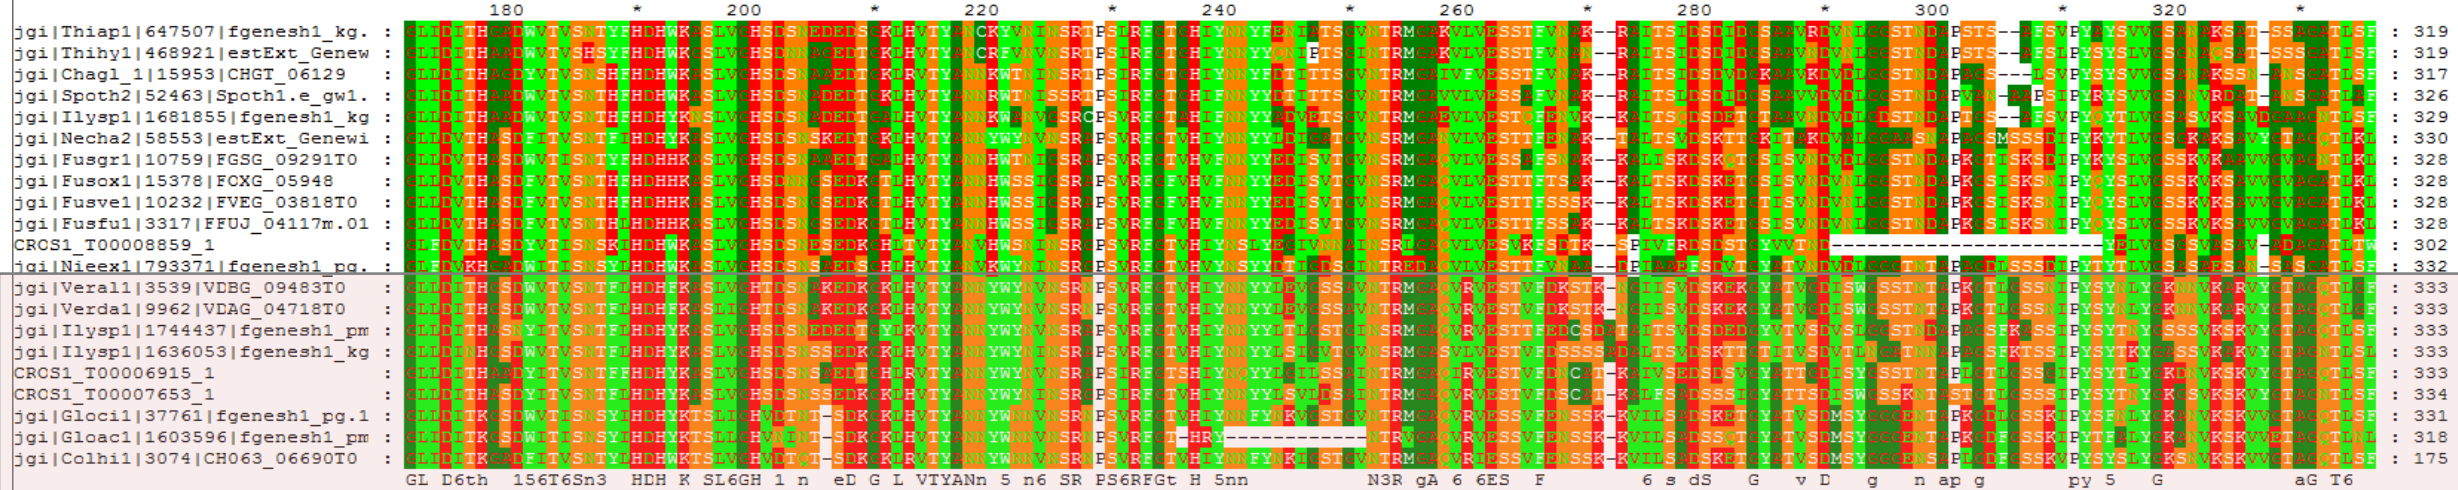

B

Additional figure 2

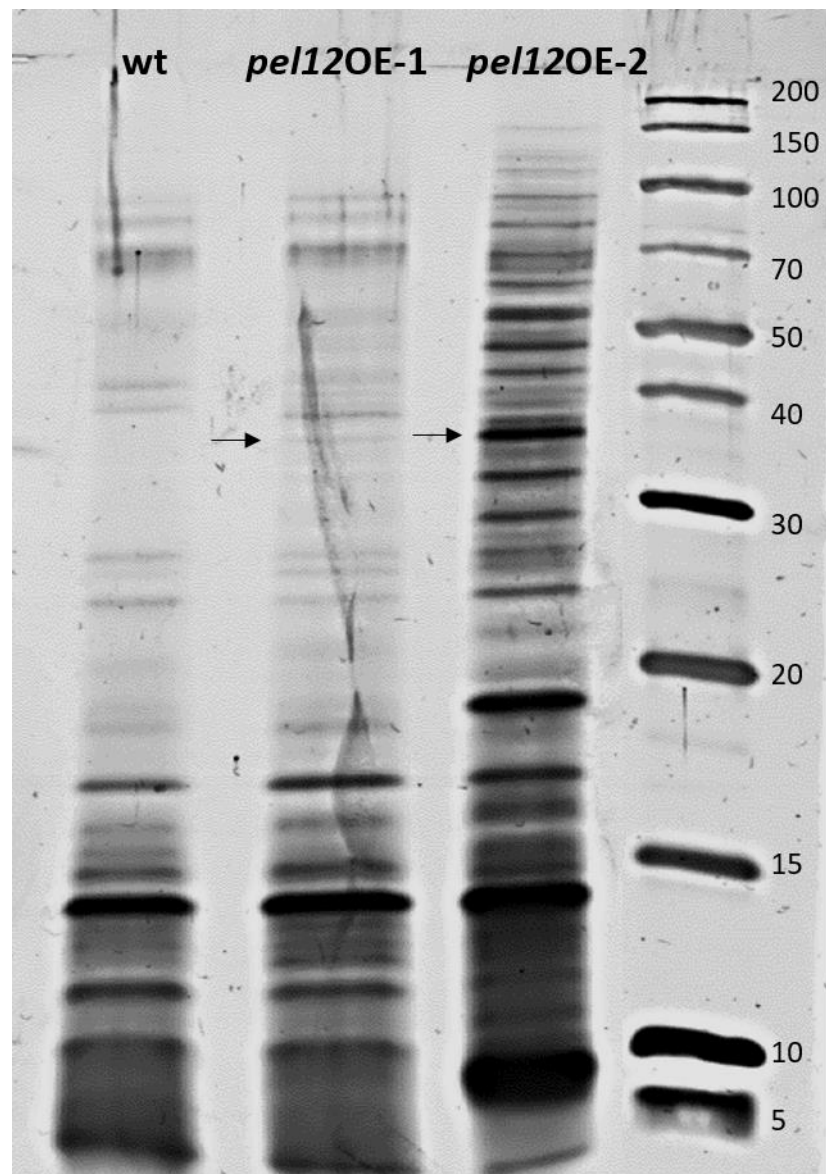

Additional figure 3

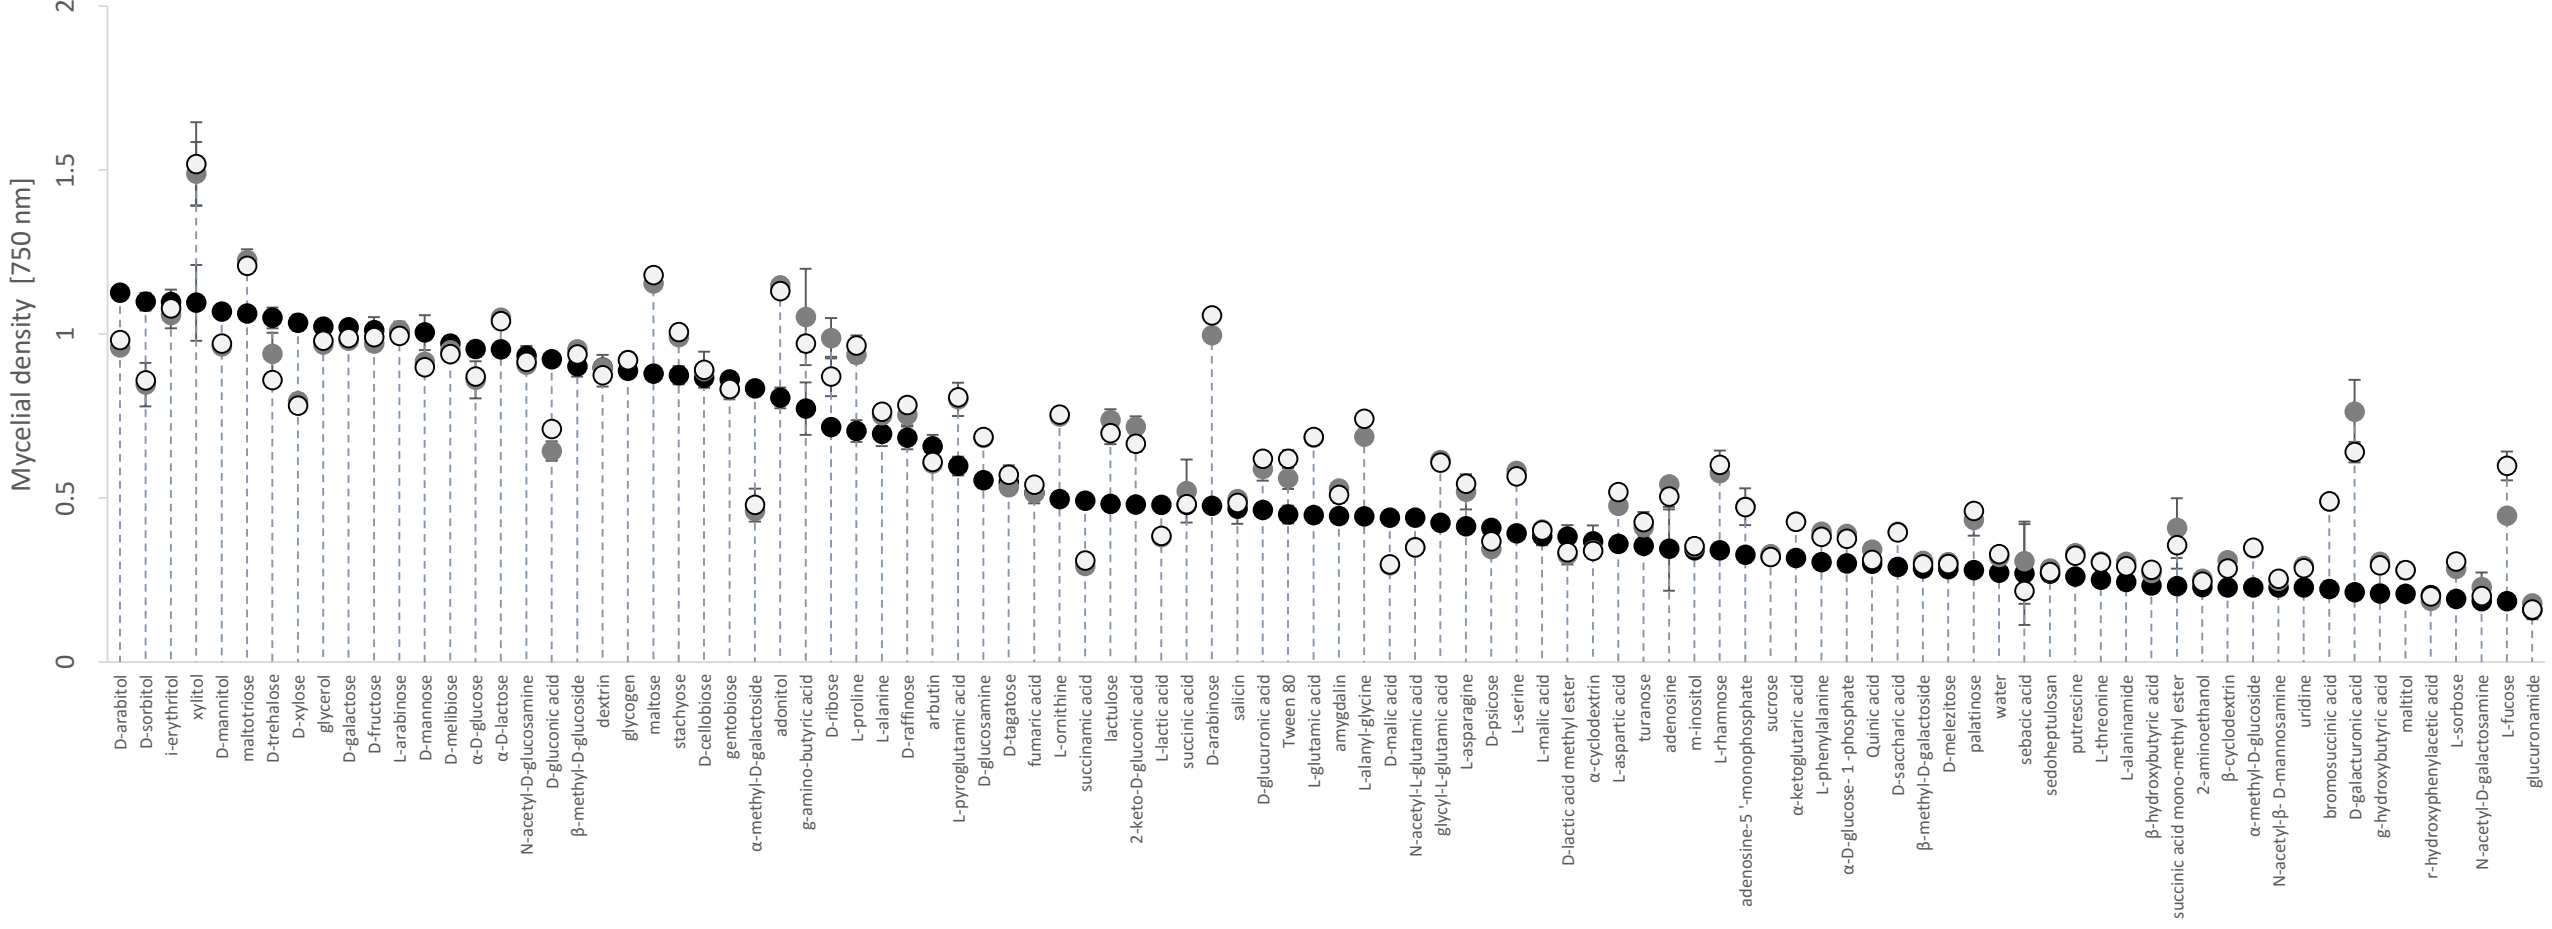

Additional figure 4

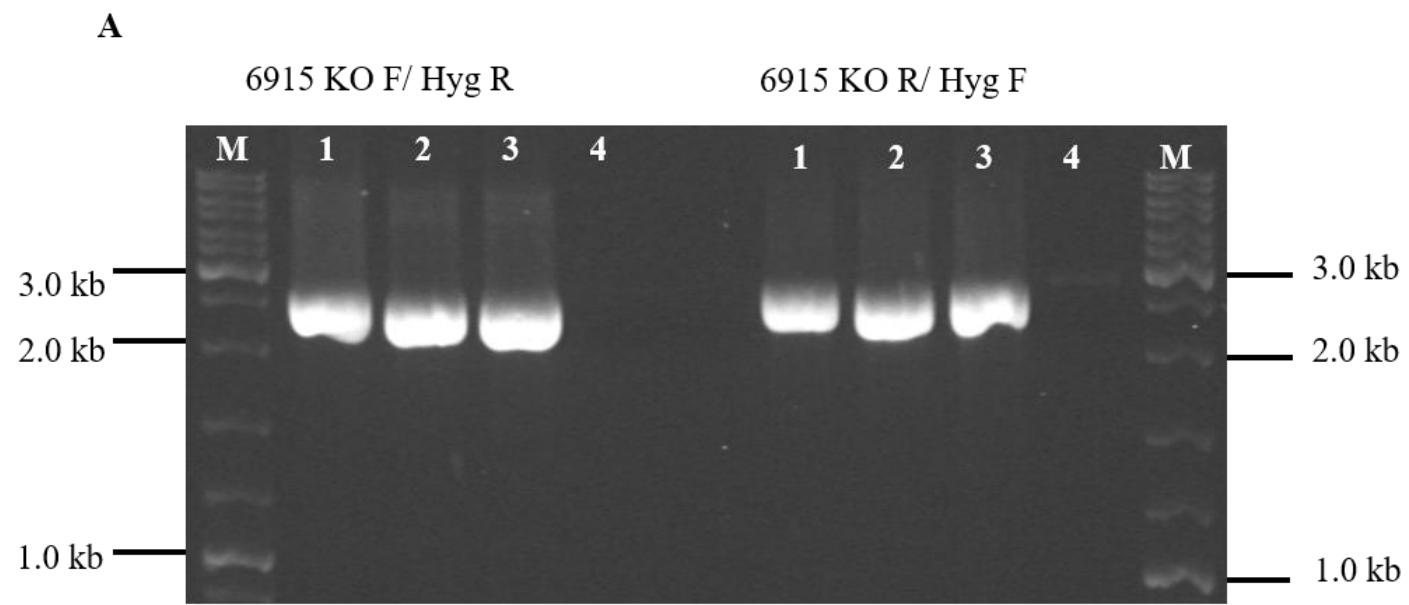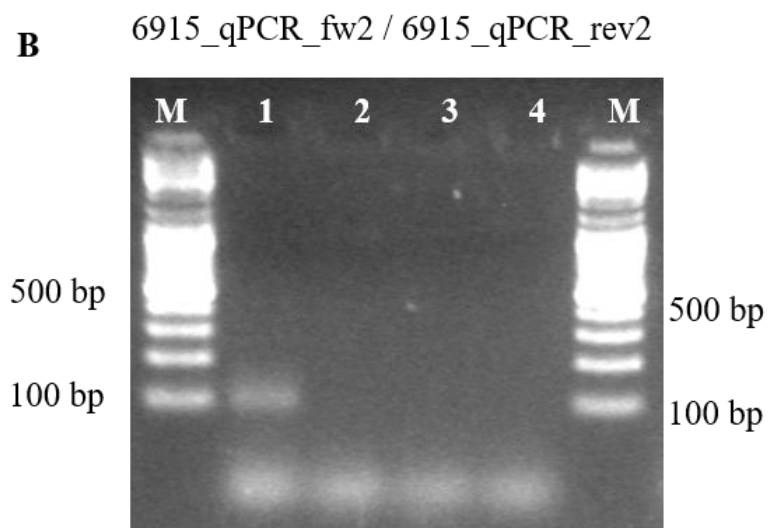

Additional figure 5

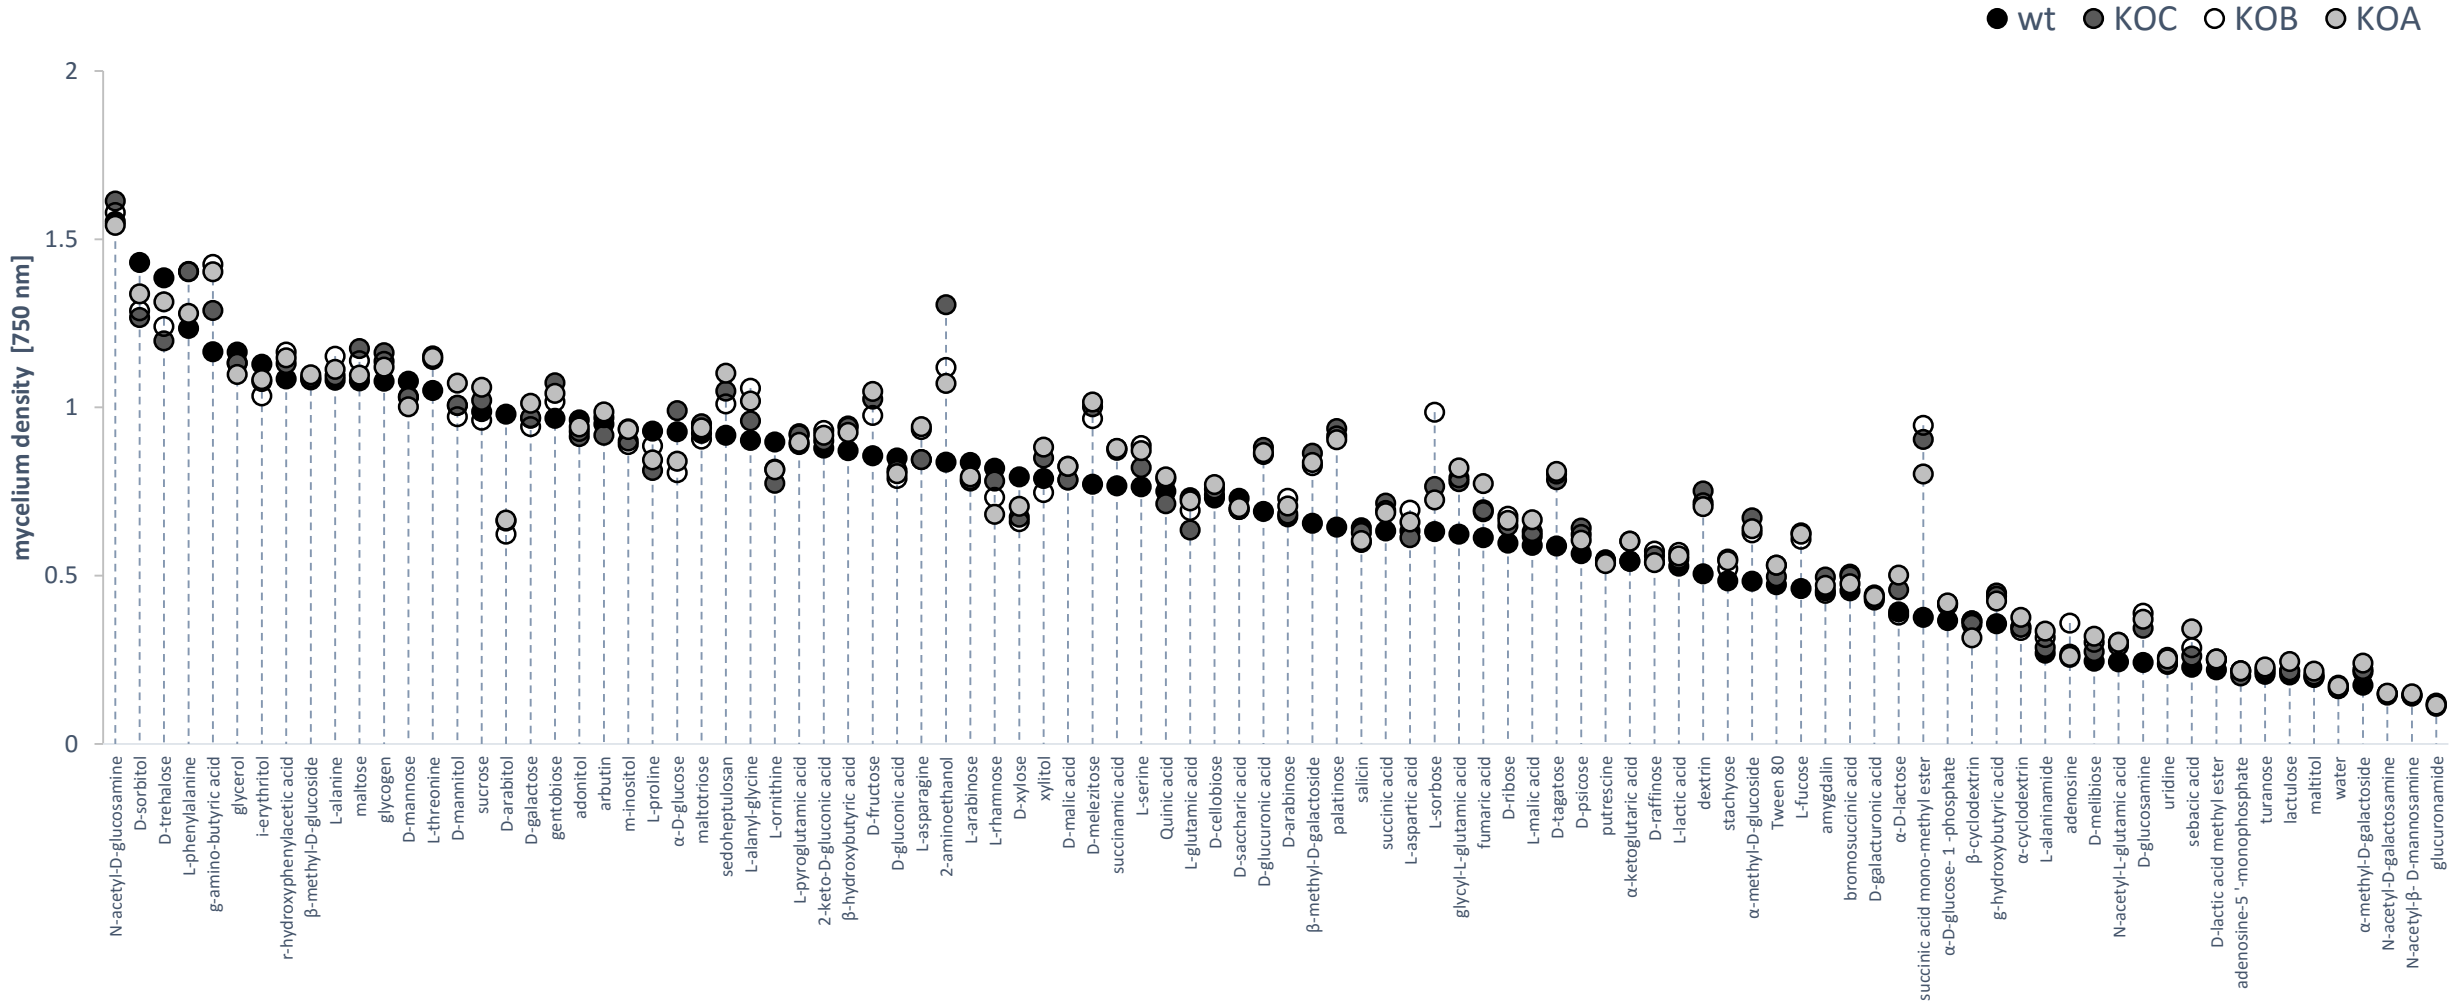

Additional figure 6

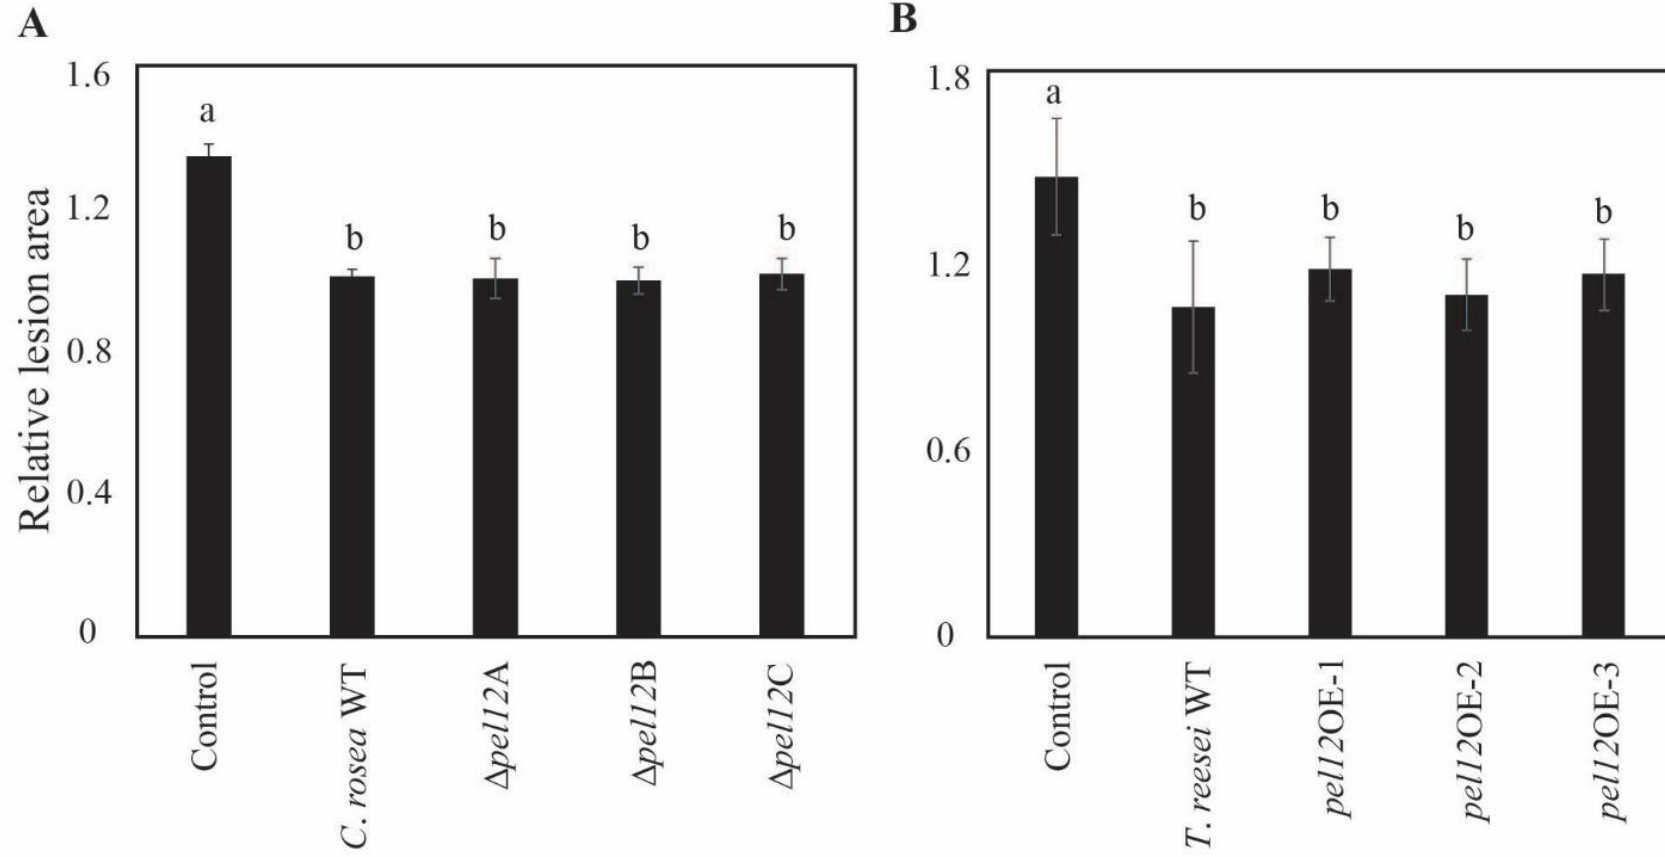

Supplement: 12866_2018_1310_MOESM2_ESM.pdf [file 12866_2018_1310_MOESM2_ESM.pdf]
