# Supplementary material for: Evolution and functional characterization of pectate lyase PEL12, a member of a highly expanded Clonostachys rosea polysaccharide lyase 1 family
Source: BMC Microbiol. 2018 Nov 7;18:178. doi: 10.1186/s12866-018-1310-9 (PMC6223089; doi:10.1186/s12866-018-1310-9)
Supplement: Supplementary file 1 — Table S1. PL1 genes in to date available Sordariomycetes genomes together with plant pathogenic Leotiomycetes Botrytis cinerea and Sclerotinia sclerotiorum. For the presentation reasons the orthologues from Sordariomycetes, B. cinerea and S. sclerotiorum are assigned to one of the 17 C. rosea PL1 genes based on the highest E-value. Genome references: [24, 35, 36, 75–101]. Table S2. PCR and qPCR primers used in this study. PE annotate primer efficiency. attB and attBr site sequences are shown in lowercase. (XLSX 19 kb) [file 12866_2018_1310_MOESM1_ESM.xlsx]

## Sheet: Add table S1 
	Organism	C. rosea Protein ID		11408	8859	2	920	8472	10915	6080	10737	8735	7710	5779	6915	7653	8627	2081	10228	7566
		Spp. abrevation	Ref.	PL1			PL1_2	PL1_4							PL1_7					PL1_9
				pel1	pel2	pel3	pel4	pel5	pel6	pel7	pel8	pel9	pel10	pel11	pel12	pel13	pel14	pel15	pel16	pel17
33	Beauveria bassiana ARSEF 2860	Beaba1	​[75]	0	0	0	0	0	0	0	0	0	0	0	0	0	0	0	0	0
5	Chaetomium globosum v1.0	Chagl	[76]	2	0	0	0	0	1	0	0	0	0	0	0	0	1	1	0	1
1	Clonostachis rosea	CROS1	[24]	1	1	1	1	1	1	1	1	1	1	1	1	1	1	1	1	1
3	Colletotrichum fiorinae PJ7	Colfi1	[77]	1	1	1	2	0	2	1	0	0	1	1	1	1	1	1	1	0
15	Colletotrichum graminicola M1.001	Colgr1	[78]	0	1	0	1	0	1	1	0	0	0	0	2	0	1	0	1	0
6	Colletotrichum higginsianum IMI 349063	Colhi1	[79]	2	0	0	1	0	2	1	0	0	1	1	2	1	0	1	3	0
34	Coniochaeta ligniaria NRRL 30616 v1.0	Conlig1	[80]	0	0	0	0	0	0	0	0	0	0	0	0	0	0	0	0	0
35	Cordyceps militaris CM01	Cormi1	[81]	0	0	0	0	0	0	0	0	0	0	0	0	0	0	0	0	0
18	Daldinia eschscholzii EC12 v1.0	DalEC12	[82]	0	0	0	1	0	0	0	0	0	0	0	0	0	0	0	1	0
10	Eutypa lata UCREL1	Eutla1	[83]	1	0	0	2	0	0	1	1	0	0	0	1	0	1	1	1	1
14	Fusarium fujikuroi IMI 58289	Fusfu1	[84]	0	0	0	1	0	2	0	0	2	1	1	0	0	1	0	1	2
13	Fusarium graminearum v1.0	Fusgr1	[85]	0	1	0	0	0	2	0	0	0	1	1	0	0	1	1	1	1
11	Fusarium oxysporum v1.0	Fusox1	[86]	0	2	0	1	0	2	0	0	1	1	1	0	0	1	1	1	0
12	Fusarium verticillioides 7600	Fusve1	[85]	0	2	0	1	0	1	0	1	1	1	1	0	0	1	1	1	0
7	Fusarium solani (Nectria haematococca v2.0)	Necha2	[87]	1	0	0	1	1	1	1	1	1	1	1	0	1	0	1	1	2
24	Grosmannia clavigera kw1407	Grocl1	[88]	0	0	0	0	0	1	0	0	0	0	0	0	0	0	1	0	0
17	Hypoxylon sp. CI-4A v1.0	HypCI4A	[82]	0	0	0	1	0	0	0	0	0	0	1	0	0	0	0	1	0
19	Hypoxylon sp. CO27-5 v1.0	HypCO	[82]	0	0	0	1	0	0	0	0	0	0	0	0	0	0	0	1	0
20	Hypoxylon sp. EC38 v1.0	HypEC38	[82]	0	0	0	1	0	0	0	0	0	0	0	0	0	0	0	1	0
26	Magnaporthe grisea v1.0	Maggr1	[89]	0	0	0	0	0	0	0	0	0	0	0	0	0	1	0	1	0
36	Metarhizium acridum CQMa 102	Metac1	[90]	0	0	0	0	0	0	0	0	0	0	0	0	0	0	0	0	0
37	Metarhizium robertsii ARSEF 23	Metan1	[90]	0	0	0	0	0	0	0	0	0	0	0	0	0	0	0	0	0
9	Myceliophthora thermophila (Sporotrichum thermophile) v2.0	Spoth2	[91]	1	1	0	0	0	1	0	0	0	0	0	0	0	0	2	0	0
31	Neurospora crassa FGSC 73 trp-3 v1.0	Neucr	[92]	0	0	0	0	0	0	0	0	0	0	0	0	0	0	1	0	0
30	Neurospora crassa OR74A v2.0	Neucr2	[93]	0	0	0	0	0	0	0	0	0	0	0	0	0	0	1	0	0
32	Neurospora discreta FGSC 8579 mat A	Neudi1	[94]	0	0	0	0	0	0	0	0	0	0	0	0	0	0	1	0	0
28	Neurospora tetrasperma FGSC 2508 mat A v2.0	Neute2	[95]	0	0	0	0	0	0	0	0	0	0	0	0	0	1	0	0	0
27	Neurospora tetrasperma FGSC 2509 mat a v1.0	Ntetras	[95]	0	0	0	0	0	0	0	0	0	0	0	0	0	1	0	0	0
23	Ophiostoma piceae UAMH 11346	Ophpc1	[96]	0	0	0	0	0	1	0	0	0	0	0	1	0	0	0	0	0
22	Phaeoacremonium aleophilum UCRPA7	Phaal1	[83]	0	0	0	0	0	1	0	0	0	0	0	1	0	1	0	0	0
25	Podospora anserina S mat+	Podan2	[97]	0	0	0	0	0	0	0	0	0	0	0	0	0	2	1	0	1
8	Thielavia hyrcaniae CBS 757.83 v1.0	Thihy1	[91]	1	0	0	0	0	1	0	0	0	1	0	0	0	1	1	0	1
29	Thielavia terrestris v2.0	Thite2	[91]	0	0	0	0	0	0	0	0	0	0	0	0	0	1	0	0	0
21	Trichoderma asperellum CBS 433.97 v1.0	Trias1	[98]	0	0	0	1	0	0	0	0	0	0	0	0	0	0	0	0	0
16	Trichoderma atroviride v2.0	Triat2	[36]	0	0	0	1	0	0	0	1	0	0	0	0	0	0	0	0	0
38	Trichoderma harzianum CBS 226.95 v1.0	Triha1	[98]	0	0	0	0	0	0	0	0	0	0	0	0	0	0	0	0	0
39	Trichoderma longibrachiatum ATCC 18648 v3.0	Trilo3	[98]	0	0	0	0	0	0	0	0	0	0	0	0	0	0	0	0	0
40	Trichoderma reesei Qm 6a v2.0	Trire2	[35]	0	0	0	0	0	0	0	0	0	0	0	0	0	0	0	0	0
41	Trichoderma virens Gv29-8 v2.0	Trivi2	[36]	0	0	0	0	0	0	0	0	0	0	0	0	0	0	0	0	0
4	Verticillium alfalfae VaMs.102	Veral1	[99]	2	0	0	1	2	2	1	0	1	1	0	1	0	2	1	0	2
2	Verticillium dahliae v1.0	Verda1	[99]	2	1	0	2	1	0	2	0	1	1	0	1	0	2	1	1	2
42	Botrytis cinarea	Botci1	[100]	0	0	0	0	1	2	0	2	0	0	0	1	1	0	0	0	0
43	Sclerotinia sclerotiorum	Sclsc1	[101]	0	0	0	0	0	1	1	1	0	0	0	1	0	0	0	0	0
	Number of homologs	Total	213	14	10	2	20	6	25	10	8	8	11	9	13	5	21	19	18	14

## Sheet: Add table S2
Primer description	Primer name	Primer sequence (5 ́ → 3`)	Tm[°C]/PE [%]	Reference
pel12 overexpression	6915fwOE2	TTATTAACATGAAGCTTTTTAGTATCATTAAC	54/na	This study
	66915revOE2	TCTAGATTAGAATGATAGAGTCTGGCCG
qPCR primer pairs	6915_qPCR_fw2	TTCGCGGGCTCCATCAAT	58/95	This study
	6915_qPCR_rev2	CCATACGGGTGTTAATAGCAGAGC
	7513_qPCR_fw2	AGGCCCTCTTCTCCGCTGAC	58/96	This study
	7513_qPCR_rev2	CTGCCCTTGCCGTAGTTGGTGTAG
	Cr_actin_qPCR_fw	GTTCTGGATTCCGGTGATGGTGTC	60/95	[71,72]
	Cr_actin_qPCR_rev	TCGGCAGTGGTGGAGAAGGTGT
pel12 gene deletion	6915_Ups F	ggggacaactttgtatagaaaagttgTCCCGCACCAGAGAAAAAGAG	55/na	This study
	6915_Ups R	ggggactgcttttttgtacaaacttgGGATTTAGAGTAGGGCTGCTGG	54/na	This study
	6915_Ds F	ggggacagctttcttgtacaaagtggCGGCAAAGACAACGTGAAGAG	55/na	This study
	6915_Ds R	ggggacaactttgtataataaagttgCGATTTAGCCACAGACGCAG	53/na	This study
Mutant validation	6915 KO F	CGGGATAGCCGAACGACTTGT	58/na	This study
	6915 KO R	ACGAGGCTGCGATGTCTTTCTAT	56/na	This study
Mutant validation	Hyg F	GCGCGCAATTAACCCTCAC	57/na	[34]
	Hyg R	GAATTGCGCGTACAGAACTCC	57/na
